# Supplementary material for: High performance electrospun bipolar membrane with a 3D junction
Source: Royal Society of Chemistry journal article supplement (doi:10.1039/c7ee00345e), 2017-01-01
Supplement: c7ee00345e1.pdf [file c7ee00345e1.pdf]

## Supplementary Information for

### High Performance Electrospun Bipolar Membrane with a 3D Junction

C. Shen<sup>1</sup>, R. Wycisk<sup>2</sup> and P. N. Pintauro<sup>3\*</sup>

<sup>1</sup> School of Material Science & Engineering, Wuhan University of Technology, Wuhan, Hubei 430070, P.R. China

<sup>2</sup> Department of Chemical and Biomolecular Engineering, Vanderbilt University, Nashville, TN 37235, USA.

\*Correspondence to: [pn.pintauro@vanderbilt.edu](mailto:pn.pintauro@vanderbilt.edu)

#### Membrane Durability and High Current Density Membrane Degradation

The durability/degradation of a 3D junction BPM was evaluated by performing three water splitting polarization experiments on the same film. In the first experiment, i-V data was collected up to a current density of 1,100 mA/cm<sup>2</sup> (curve A in Fig. S1). A photograph of this membrane after data collection is shown in Fig. S2 (right side photograph); no physical damage was found. A second water splitting polarization curve was obtained with the same BPM where the maximum current was raised to 1,800 mA/cm<sup>2</sup> (Curve B in Fig. 1). Curves A and B are essentially identical, indicating no membrane degradation during the collection of curve A data. A third water splitting i-V plot (curve C) was obtained after the collection of curve B data. . As can be seen, after passing a current density of 1,800 mA/cm<sup>2</sup>, the 3D junction BPM exhibited severe degradation, as indicated by the high transmembrane voltage drop for a modest current density. Between repeated polarization experiments, the membrane was allowed to soak in a 0.5 M Na<sub>2</sub>SO<sub>4</sub> solution at room temperature (four months between curves A and B; 24 hours between curves B and C).

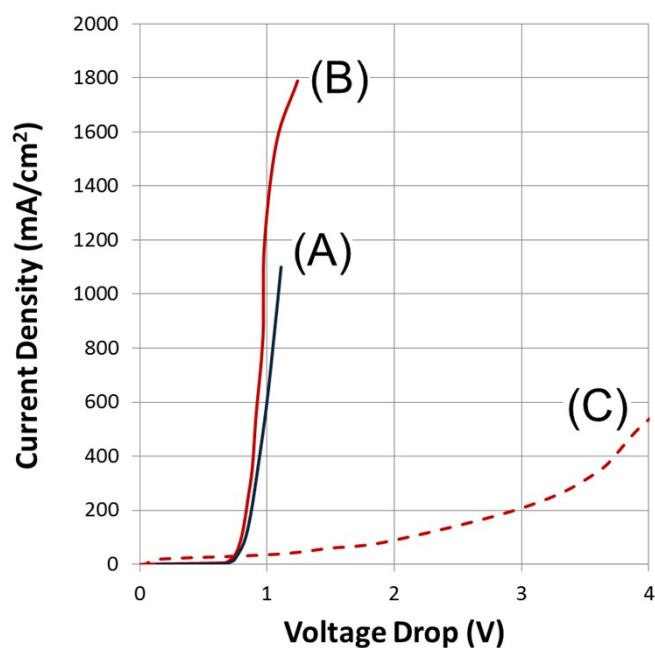

Figure S1. Water splitting i-V plots for the same electrospun bipolar membrane with a 3D junction. Curve A – initial polarization curve; Curve B polarization curve after collecting Curve A data and after soaking the membrane in 0.5 M  $\text{Na}_2\text{SO}_4$  for four months; Curve C polarization curve after collecting Curve B and after soaking the membrane in 0.5 M  $\text{Na}_2\text{SO}_4$  for 24 hours.

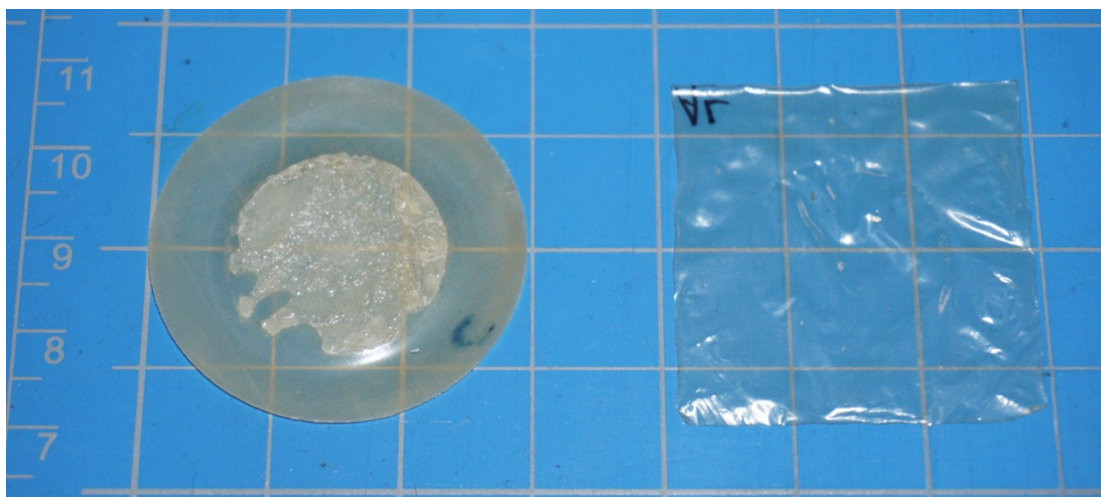

Figure S2. Visual photographs of bipolar membranes after a high current density water splitting polarization experiment, where the maximum current density was 1,100  $\text{mA}/\text{cm}^2$ . A Fumasep® FBM membrane from Fumatech GmbH (left) showing blistering/degradation and a 3D junction electrospun membrane, shown after collecting Curve A i-V data in Fig. S1 (right).
